# Supplementary material for: CFH Loss in Human RPE Cells Leads to Inflammation and Complement System Dysregulation via the NF-κB Pathway
Source: MDPI journal article supplement (doi:10.3390/ijms22168727), 2021-08-13
Supplement: s1 [file s1]

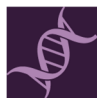

Article

# Supplementary Material: CFH loss in human RPE cells leads to inflammation and complement system dysregulation *via* the NF- $\kappa$ B pathway

Angela Armento<sup>1\*</sup>, Tiziana L. Schmidt<sup>1\*</sup>, Inga Sonntag<sup>1</sup>, David Merle<sup>1</sup>, Mohamed Ali Jarbou<sup>1</sup>, Ellen Kilger<sup>1</sup>, Simon J. Clark<sup>1,2,3</sup>, Marius Ueffing<sup>1,2</sup>

<sup>1</sup> Institute for Ophthalmic Research, Department for Ophthalmology, Eberhard Karls University of Tübingen, Tübingen, Baden-Württemberg, 72076, Germany

angela.armento@uni-tuebingen.de (A.A.), TizianaLuisa@web.de (T.L.S.), inga.Sonntag@uni-tuebingen.de (I.S.), david.merle@medun-igraz.at (D.M.), mohamed-ali.jarbou@uni-tuebingen.de (M.A.J.), ellen.kilger@uni-tuebingen.de (E.K.), marius.ueffing@uni-tuebingen.de (M.Ue)

<sup>2</sup> University Eye Clinic, Department for Ophthalmology, Eberhard Karls University of Tübingen, Tübingen, Baden-Württemberg, 72076, Germany

simon.clark@uni-tuebingen.de (S.J.C)

<sup>3</sup> Lydia Becker Institute of Immunology and Inflammation, Faculty of Biology, Medicine and Health, University of Manchester, Manchester, M13 9PT, UK

\*Both authors share equal first authorship (A.A., T.L.S.); correspondence should be addressed to:

Angela Armento, PhD, angela.armento@uni-tuebingen.de, Phone: +49 7071 29 84953; Marius Ueffing, PhD, marius.ueffing@uni-tuebingen.de. Institute for Ophthalmic Research, Department for Ophthalmology, Eberhard Karls University of Tübingen, Tübingen, Baden-Württemberg, 72076, Germany.

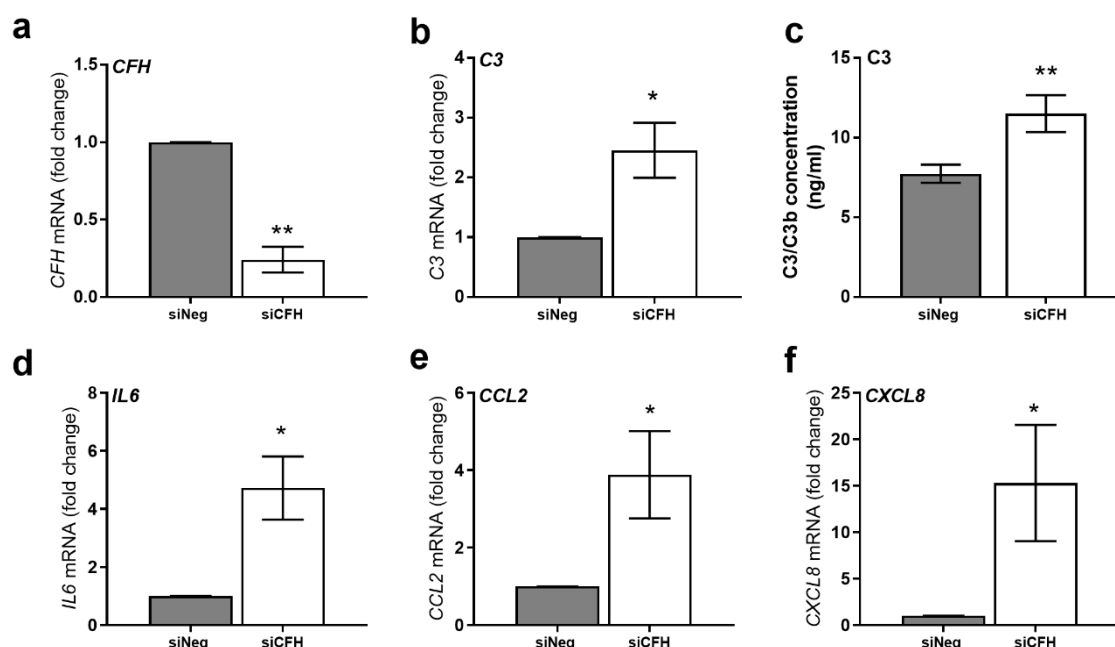

**Figure S1.** FH reduction leads to increased expression levels of C3 and inflammatory cytokines. **a** Evaluation of *CFH* expression by qRT-PCR analyses. **b** Monitoring of complement component 3 (*C3*) gene expression by qRT-PCR analyses in ARPE19 cells. **c** C3/C3b ELISA analyses of cell culture supernatants of ARPE19 cells. SEM is shown,  $n=4$ . **d-f** monitoring of gene expression of **d**

interleukin-6 (*IL6*), **e** C-C Motif Chemokine Ligand 2 (*CCL2*) and **f** interleukin-8 (*CXCL8*). qRT-PCR data are normalized to house-keeping gene *PRPL0* using  $\Delta\Delta C_t$  method. SEM is shown,  $n=4$ . Significance was assessed by Student's t-test. \* $p<0.05$ , \*\* $p<0.01$ .

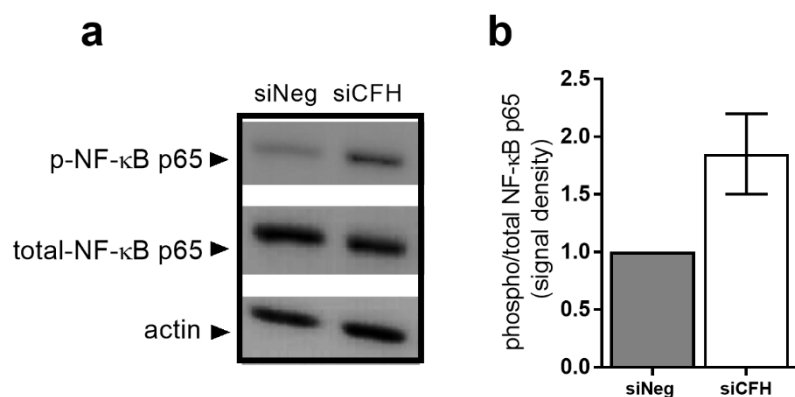

**Figure S2. RPE cells deprived of FH show NF-κB activation.** **a** Western blot analyses of phosphorylated and total levels of NF-κB p65 subunit in cell lysates of ARPE19 cells. Total actin was used as loading control. **b** Quantification of signal density of at least 3 independent experiments as reported in **a**. Bars indicate the signal density ratio between levels of phosphorylated and total NF-κB p65 subunit. Western Blot images were cropped, and full-length blots are provided in Supplementary Material.

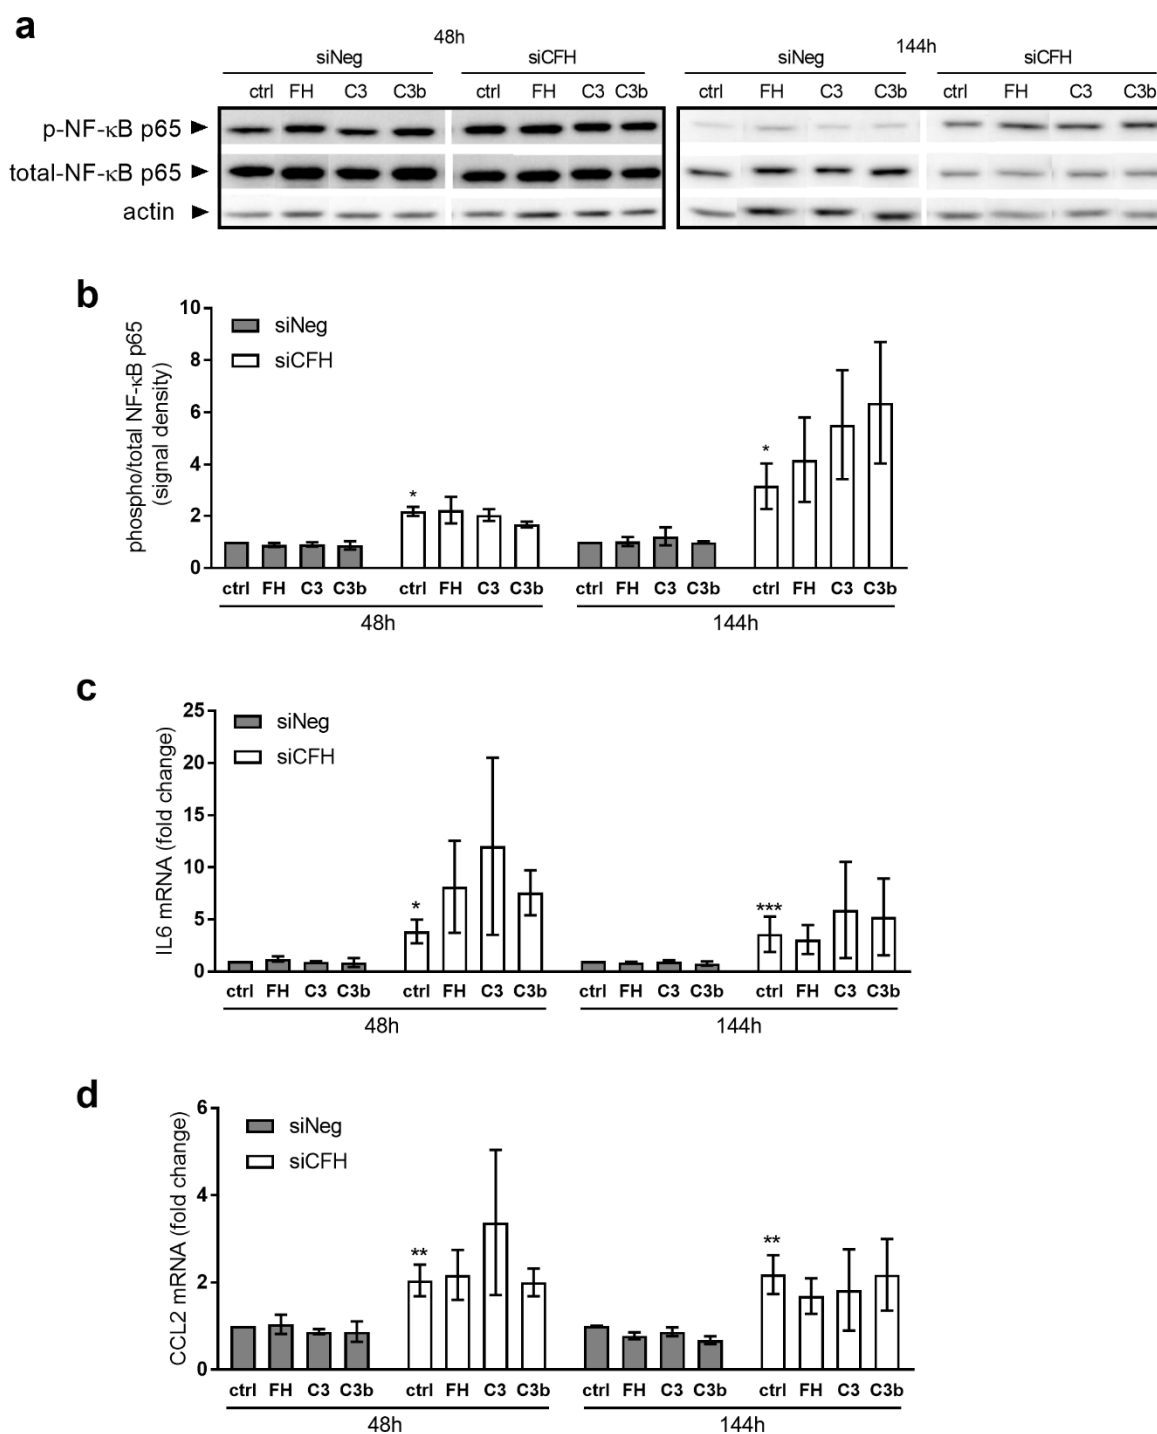

**Figure S3. Impact of exogenous FH, C3 and C3b in hTERT-RPE1 cells.** **a** Western blot analyses of phosphorylated and total levels of NF-κB p65 subunit in cell lysates of hTERT-RPE1. Total actin was used as loading control **b** Quantification of signal density of at least 4 independent experiments in the conditions reported in **a**. Bars indicate the signal density ratio between phosphorylated and total levels of NF-κB p65 subunit. **c-d** gene expression analyses of hTERT-RPE1 cells in the conditions reported in **a**: *IL6* in panel **c**, *CCL2* in panel **d**. SEM is shown,  $n=4-8$ . Western Blot images were cropped, and full-length blots are provided in Supplementary Material. Significance was assessed by Student's t-test. \* $p<0.05$ , \*\* $p<0.01$ , \*\*\* $p<0.001$ .

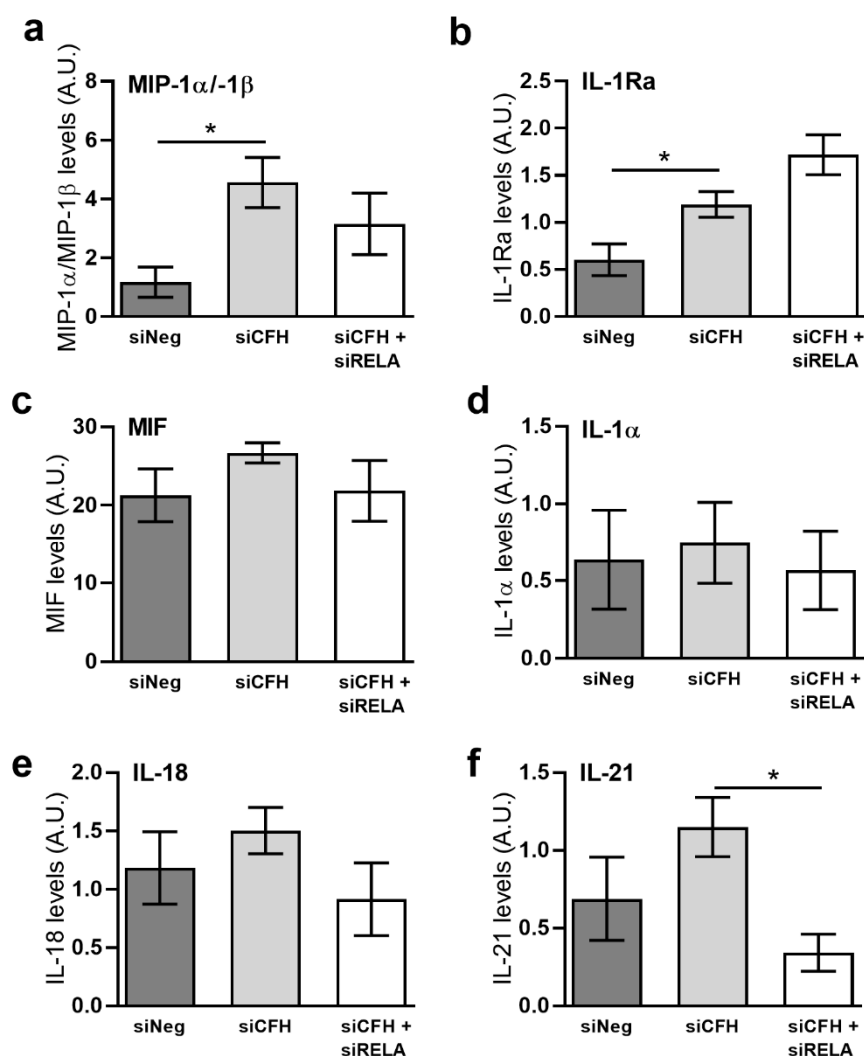

**Figure S4.** Cytokines profile in hTERT-RPE1 cells. **a-f** Quantification of signal density in the conditions reported in Fig. 3a: **a** C-C motif chemokine ligand 3/4, MIP-1 $\alpha$ -1 $\beta$ ; **b** interleukin 1 receptor antagonist, IL-1Ra. **c** macrophage migration inhibitory factor, MIF; **d** interleukin-1 alpha, IL-1 $\alpha$ ; **e** interleukin-18, IL-18; **f** interleukin-21, IL-21. SEM is shown. n=3. Significance was assessed by Student's t-test. \*p<0.05.

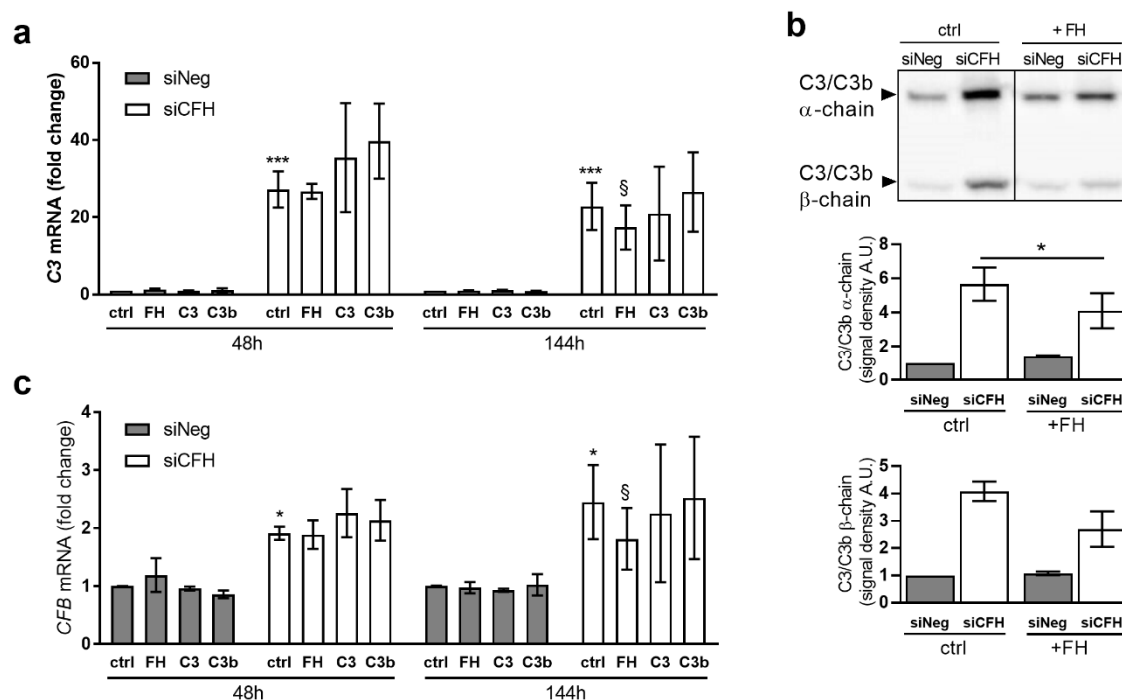

**Figure S5. Impact of exogenous FH, C3 and C3b in hTERT-RPE1 cells.** **a** C3 gene expression analyses of hTERT-RPE1 cells **b** Western blot analyses and quantification of phosphorylated and total levels of NF- $\kappa$ B p65 subunit in cell lysates of hTERT-RPE1. Total actin was used as loading control. Western Blot images were cropped, and full-length blots are provided in Supplementary Material **d. c** CFB gene expression analyses of hTERT-RPE1 cells.

SEM is shown, n=4-8. Significance was assessed by Student's t-test. Comparison between siNeg and siCFH: \*p<0.05, \*\*p<0.01, \*\*\*p<0.001. Comparison between siCFH ctrl and siCFH FH: § p < 0.05.
